# Supplementary material for: Synthesis of electroactive mesoporous gold–organosilica nanocomposite materials via a sol–gel process with non-surfactant templates and the electroanalysis of ascorbic acid
Source: Royal Society of Chemistry journal article supplement (doi:10.1039/c3tb20433b), 2013-01-01
Supplement: c3tb20433b.pdf [file c3tb20433b.pdf]

# Supporting Information

## Synthesis of Electroactive Mesoporous Gold-Organosilica Nanocomposite Materials via Sol-Gel Process with Nonsurfactant Templates and Electroanalysis of Ascorbic Acid

*Chang-JianWeng, Po-Hsuan Hsu, Sheng-Chieh Hsu, Chi-Hao Chang,  
Wei-I Hung, Pei-Shan Wu, Jui-Ming Yeh\**

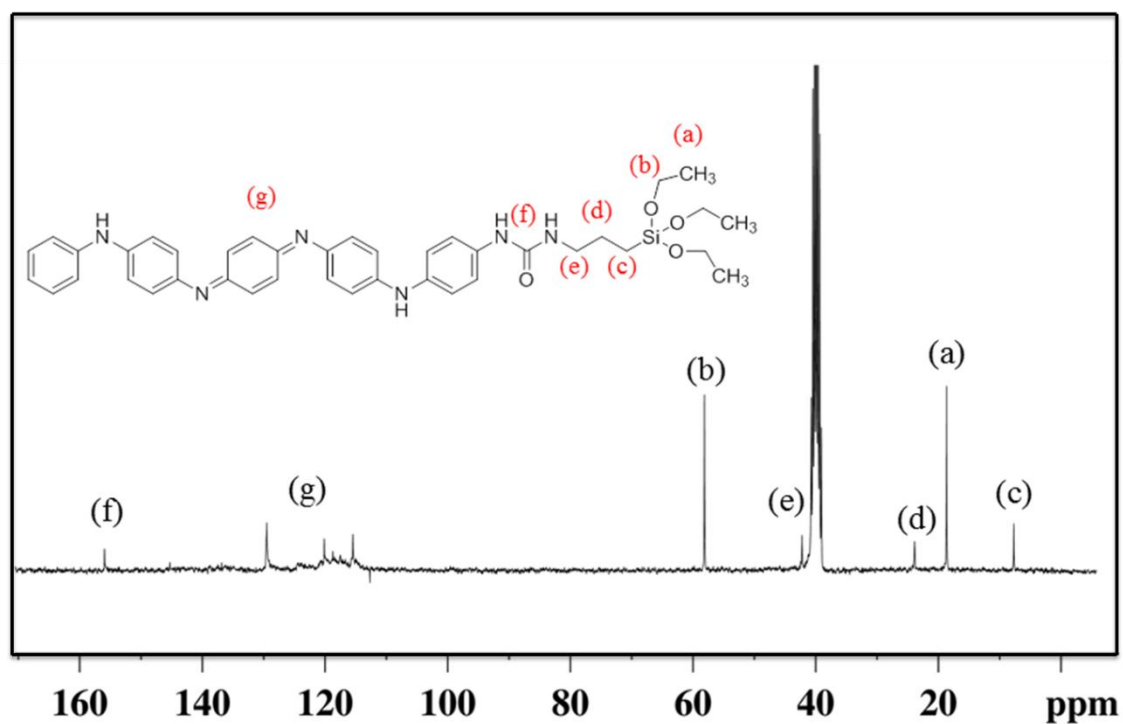

S-1.  $^{13}\text{C}$  NMR (ppm) spectrum of TESPIC-AP.

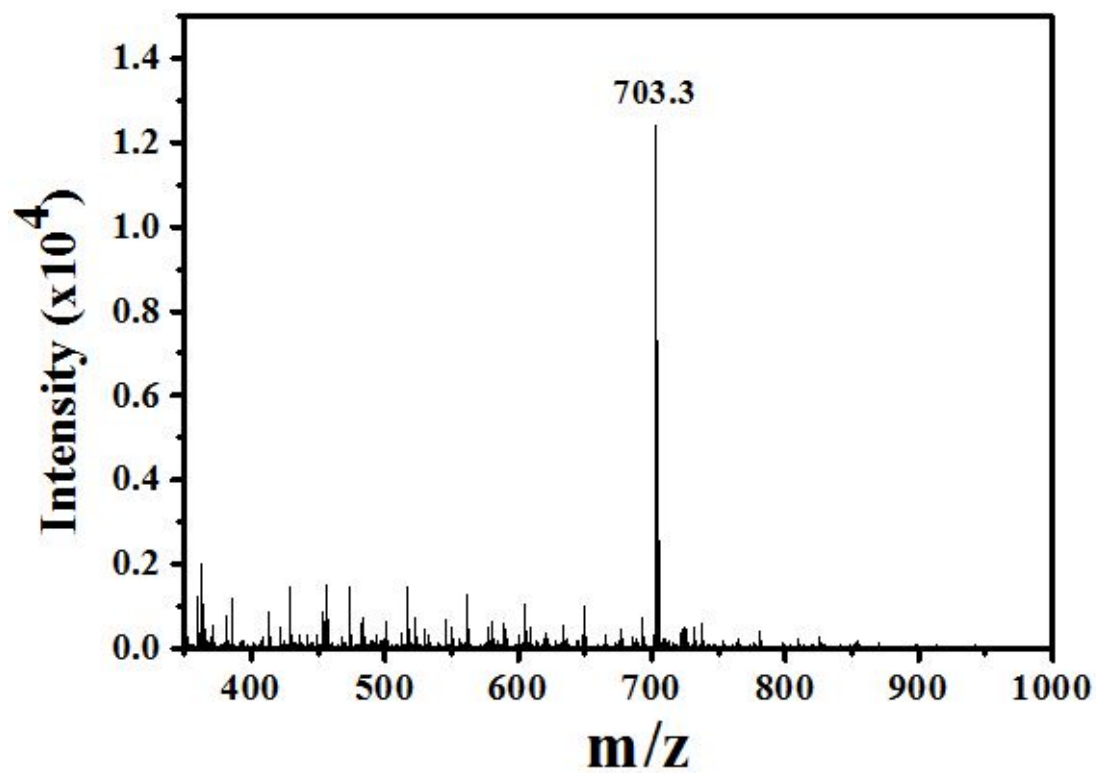

S-2. Mass spectrum of TESPIC-AP.

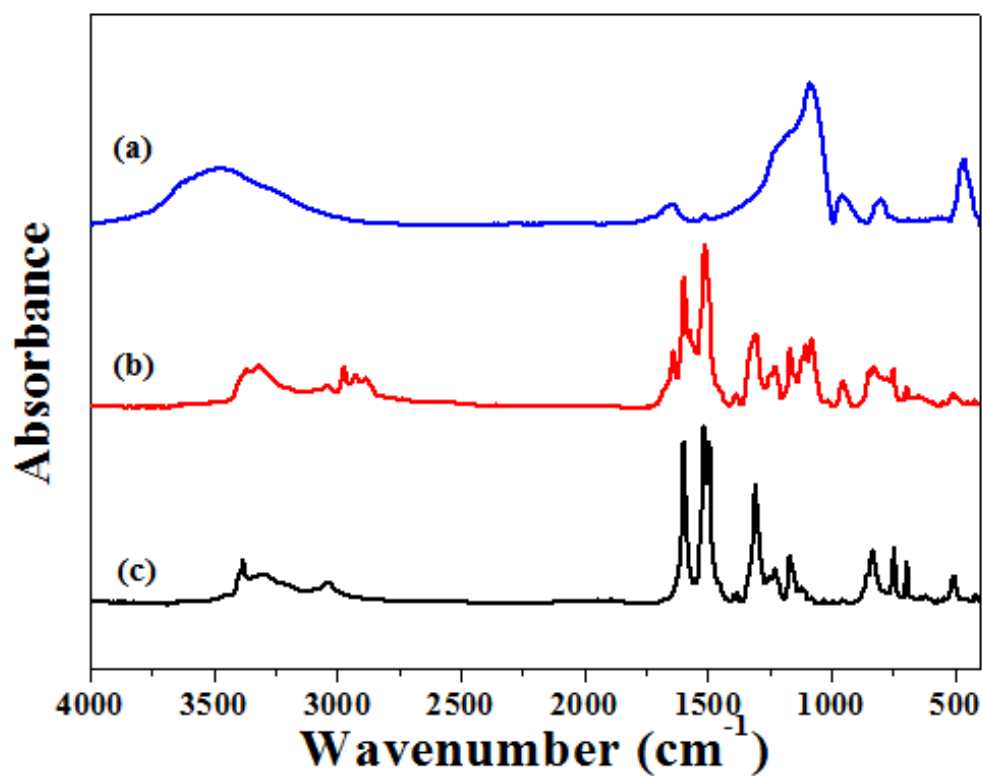

S-3. FTIR spectra of (a) EMON5, (b) TESPIC-AP, and (c) AP.

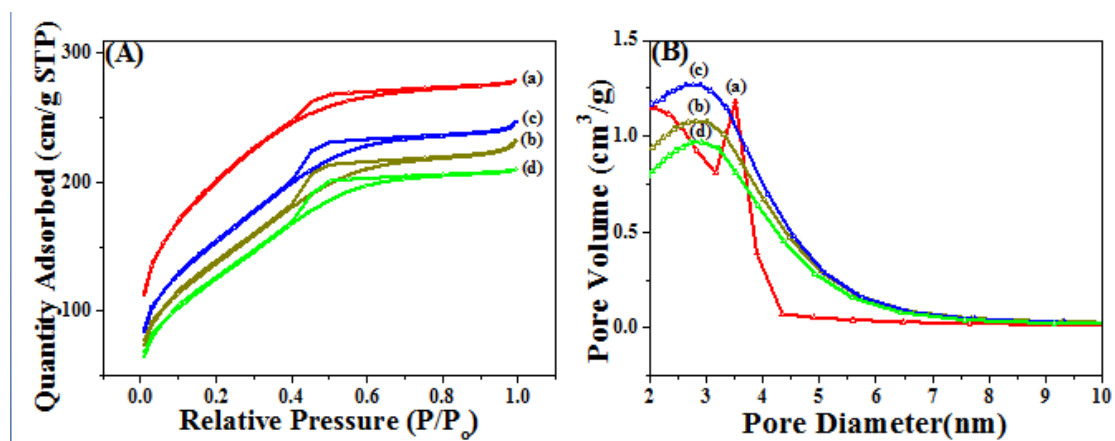

S-4.(A) Nitrogen adsorption-desorption isotherms for: (a)EMON5 (b) EMGON5-0.1(c)EMGON5-1(d)EMGON5-10 (B)Pore-size distribution curves for: (a)EMON5 (b) EMGON5-0.1(c)EMGON5-1(d)EMGON5-10
